# Supplementary material
Source: PubMed Central journal article supplement (PMC5179929)
Supplement: supp_ddw181_HOU_ET_AL_SUPPLEMENTAL.pdf [file supp_ddw181_HOU_ET_AL_SUPPLEMENTAL.pdf]

## **Supplementary materials**

### **1. Description of individual study samples**

The current study combined BD case-control GWAS datasets from 5 previous studies (here designated GAIN-NIMH, TGEN1, BoMA Bipolar, WTCCC1-BD, and STEP-BD).

These are described in detail elsewhere (1-7).

To increase power, we also used SNP array data from 2,072 bipolar patients submitted to the Consortium on Lithium Genetics (ConLiGen) project.(8) Individuals diagnosed by a psychiatrist or clinical psychologist with a DSM-III or DSM-IV diagnosis of BD were included in this study. Most subjects had bipolar I or bipolar II disorder and were treated over a period of at least 6 months with lithium. Further details on this sample have been reported elsewhere (9).

We also obtained SNP array data for 20,998 psychiatrically unscreened controls from dbGaP and WTCCC2 (the 1958 British Birth Cohort and the National Blood Donors Cohort) who were enrolled in studies unrelated to neuropsychiatric disorders. A summary of the dbGaP datasets used (totaling 18,274 individuals) is provided in table S4. The WTCCC2 sample was obtained from Wellcome Trust Case Control Consortium Data Access Committee (EGAD00000000021 and EGAD00000000023). To avoid overlap, only controls who were not included in the WTCCC1 GWAS study (above) were used here.

Data were parsed into 6 sub-studies (Table1), matching cases and controls by genotyping platform. Since exact matching was not possible, Affymetrix platforms, earlier generation, and later generation Illumina platforms were each grouped separately.

## 2. Supplementary Figures

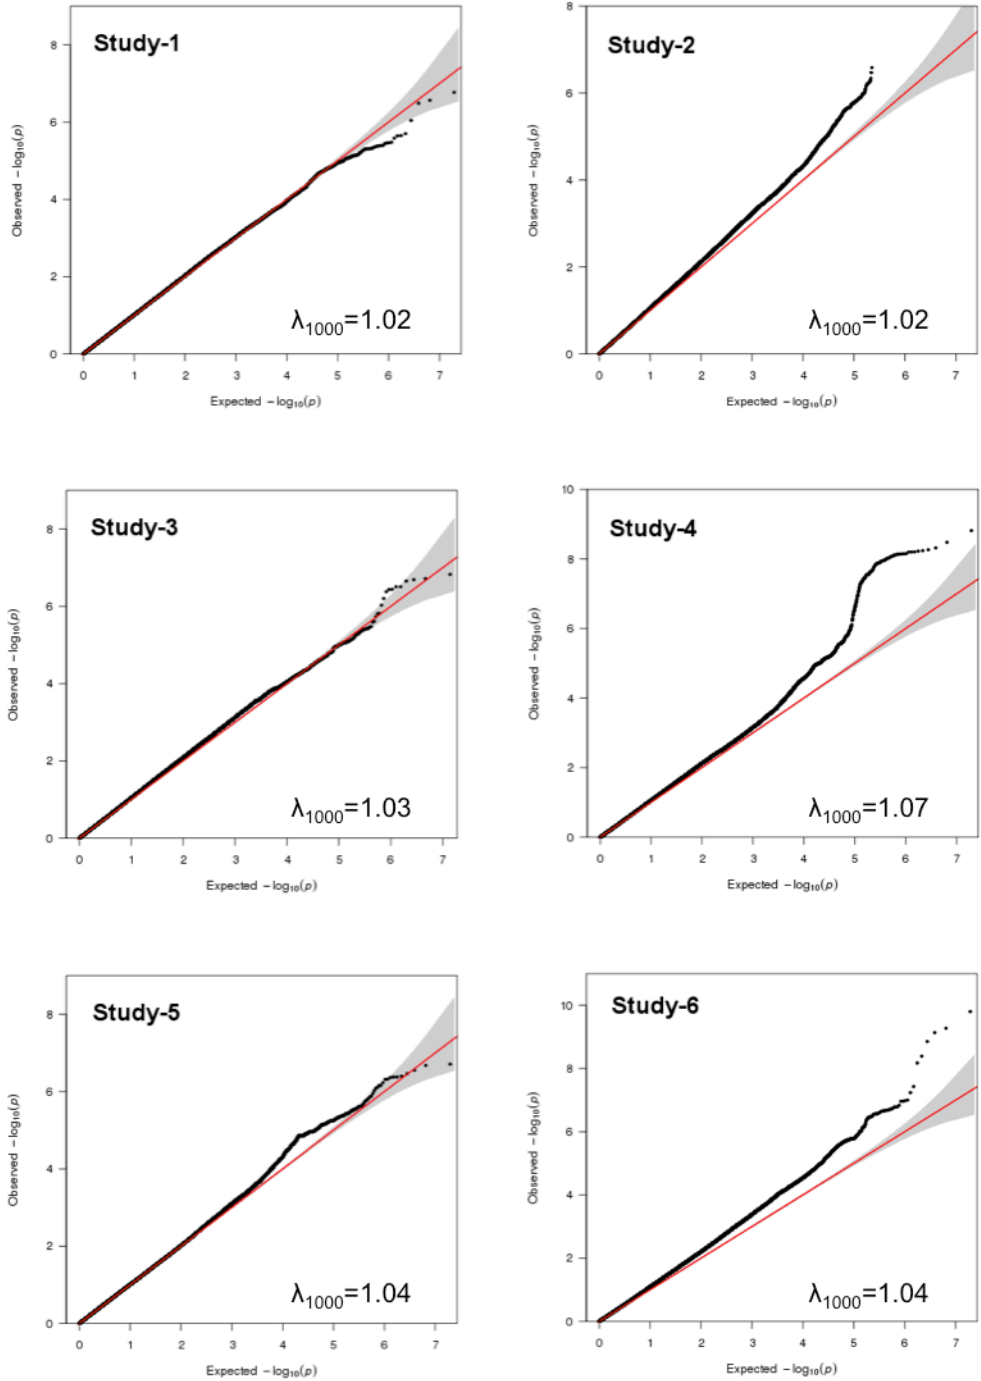

**Figure S1:** Q-Q plots for stage 1 sub-studies.

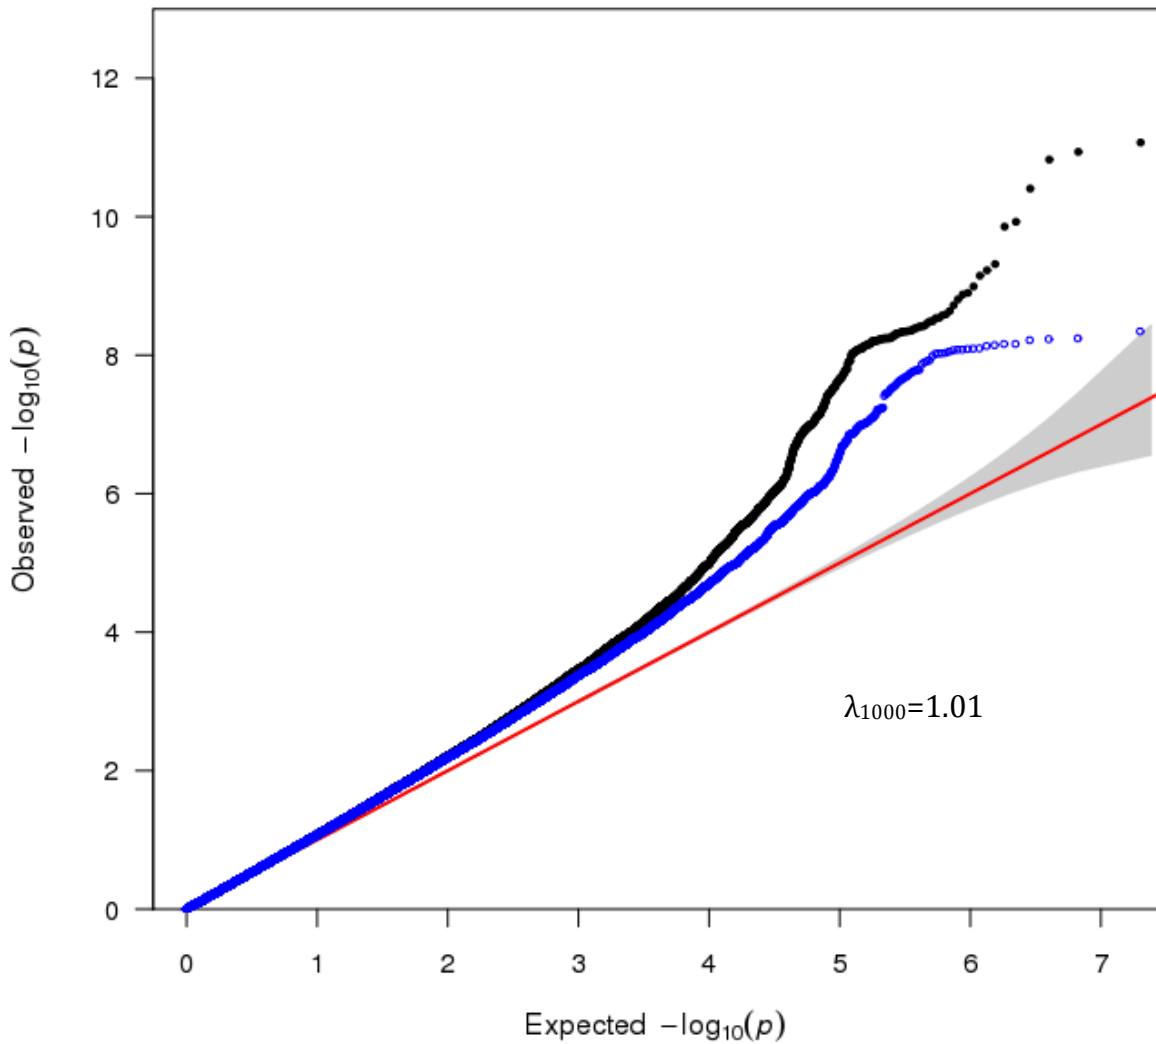

**Figure S2.** Q-Q plots of the meta-analysis results showing all markers (black) and after excluding previously known loci (blue). The standardized inflation factors ( $\lambda_{1000}$ ) were 1.0059 for all markers and 1.0057 after excluding previously known loci.

a: rs9834970 (T)

Study

Study-1  
Study-2  
Study-3  
Study-4  
Study-5  
Study-6  
Swedish sample 1  
Swedish sample 2

Fixed effect model

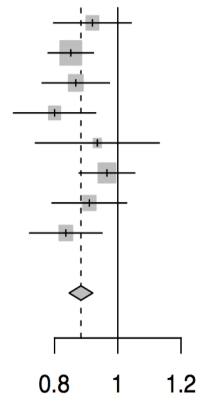

OR 95%-CI W(fixed)

0.92 [0.80; 1.04] 9.3%  
0.85 [0.78; 0.92] 27.3%  
0.87 [0.76; 0.97] 12.4%  
0.80 [0.67; 0.93] 8.3%  
0.94 [0.74; 1.13] 3.7%  
0.97 [0.88; 1.05] 18.1%  
0.91 [0.79; 1.03] 10.1%  
0.84 [0.72; 0.95] 10.7%

**0.88 [0.85; 0.92] 100%**

b: rs1487441 (A)

Study

Study-1  
Study-2  
Study-3  
Study-4  
Study-5  
Study-6  
Swedish sample 1  
Swedish sample 2

Fixed effect model

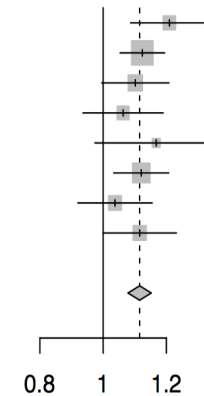

OR 95%-CI W(fixed)

1.21 [1.09; 1.33] 9.2%  
1.12 [1.05; 1.19] 27.9%  
1.10 [1.00; 1.21] 12.2%  
1.06 [0.94; 1.19] 8.6%  
1.17 [0.97; 1.36] 3.7%  
1.12 [1.03; 1.21] 18.3%  
1.04 [0.92; 1.15] 10.0%  
1.12 [1.00; 1.23] 10.2%

**1.12 [1.08; 1.15] 100%**

c: rs4236274 (G)

Study

Study-1  
Study-2  
Study-3  
Study-4  
Study-5  
Study-6  
Swedish sample 1  
Swedish sample 2

Fixed effect model

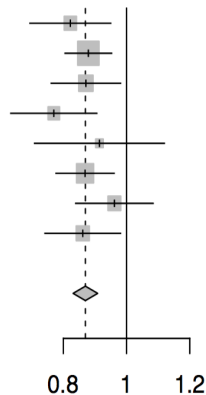

OR 95%-CI W(fixed)

0.82 [0.69; 0.95] 9.3%  
0.88 [0.81; 0.95] 27.8%  
0.87 [0.76; 0.98] 12.6%  
0.77 [0.63; 0.91] 8.2%  
0.91 [0.71; 1.12] 3.6%  
0.87 [0.78; 0.96] 17.9%  
0.96 [0.84; 1.08] 10.1%  
0.86 [0.74; 0.98] 10.6%

**0.87 [0.83; 0.91] 100%**

d: rs1054442 (C)

Study

Study-1  
Study-2  
Study-3  
Study-4  
Study-5  
Study-6  
Swedish sample 1  
Swedish sample 2

Fixed effect model

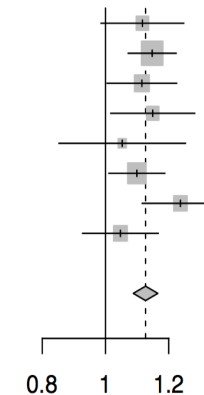

OR 95%-CI W(fixed)

1.12 [0.99; 1.25] 8.8%  
1.15 [1.07; 1.22] 26.2%  
1.12 [1.00; 1.23] 12.5%  
1.15 [1.02; 1.28] 8.6%  
1.05 [0.85; 1.25] 3.8%  
1.10 [1.01; 1.19] 19.3%  
1.24 [1.12; 1.36] 10.3%  
1.05 [0.93; 1.17] 10.6%

**1.13 [1.09; 1.17] 100%**

**Figure S3:** Genetic effect sizes for the most significant SNP of four replicated known BD risk loci.

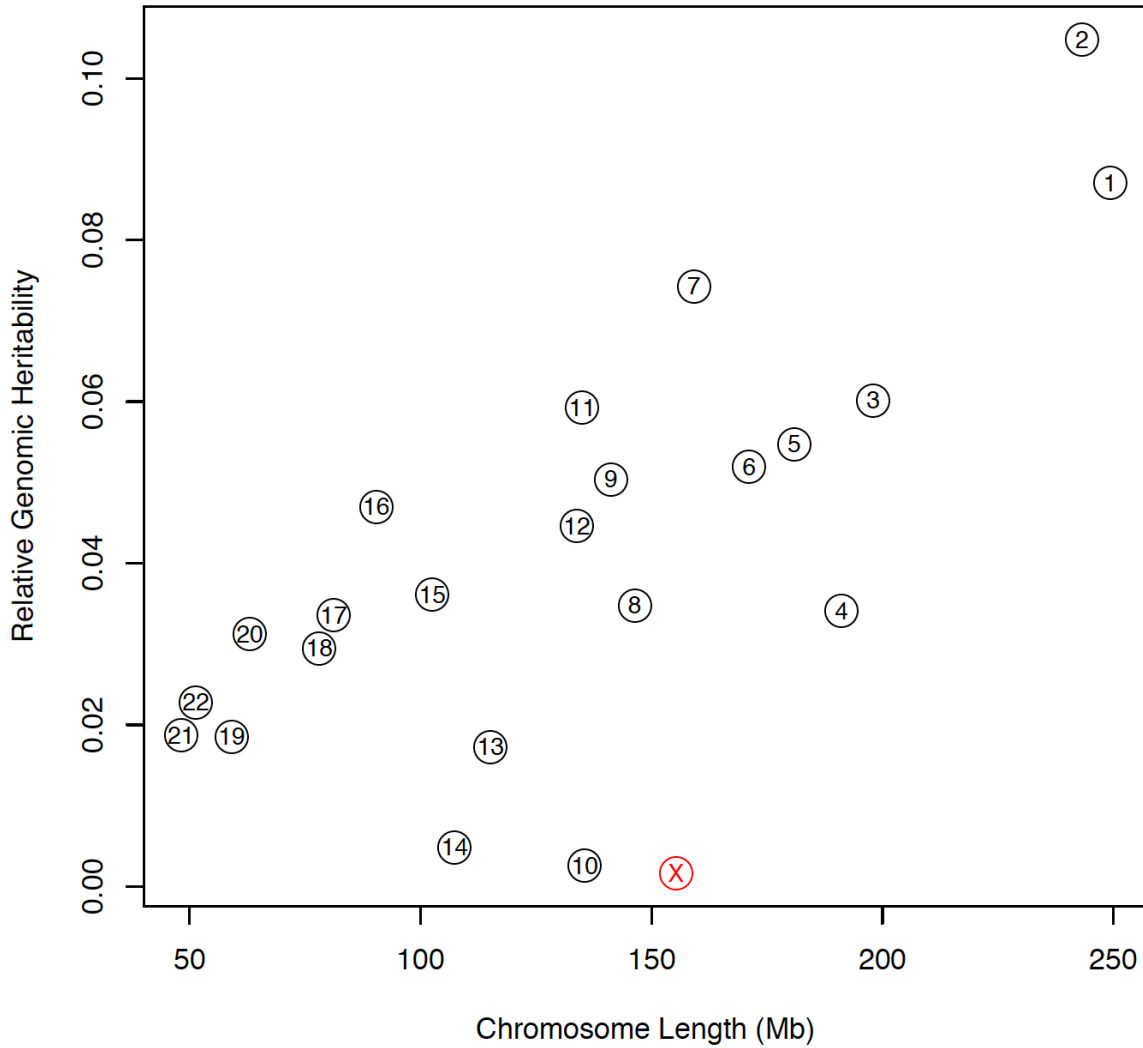

**Figure S4 Genomic heritability explained by each chromosome.** Relative genomic heritability is defined as the proportion of variance in disease liability attributable to each chromosome, divided by the total genomic heritability. Relative genomic heritability values are shown as medians across study samples. **Markers on X chromosome (highlighted in red) explained an unexpectedly small proportion of the heritability.**

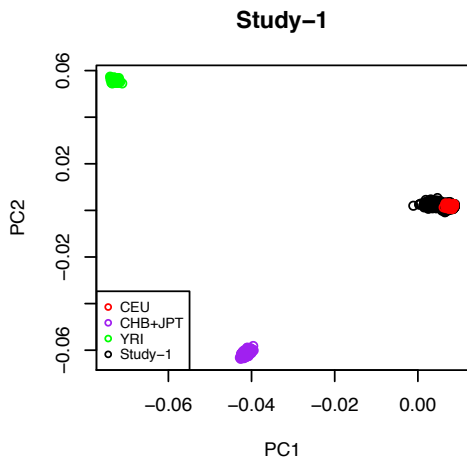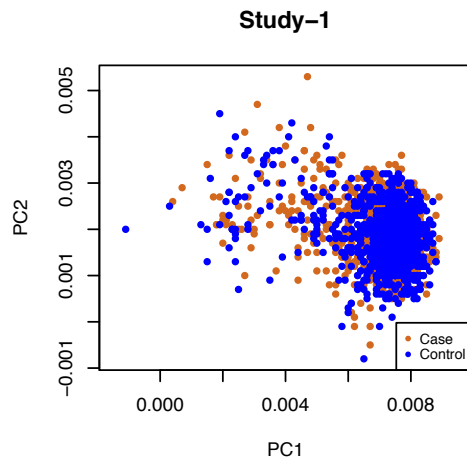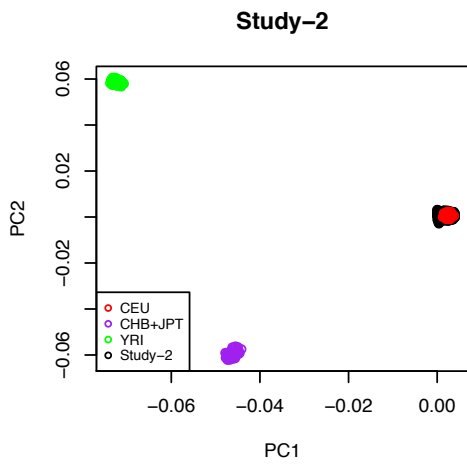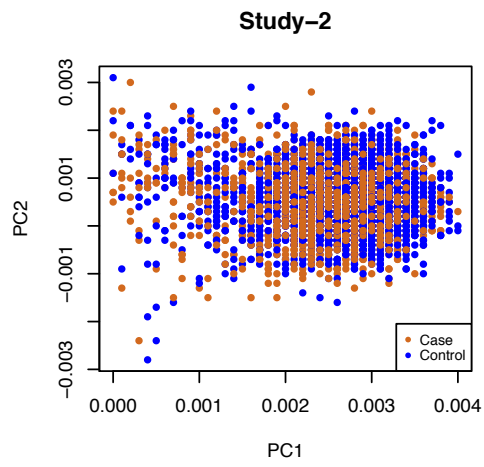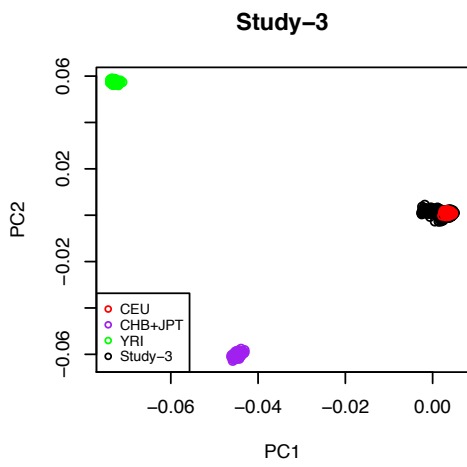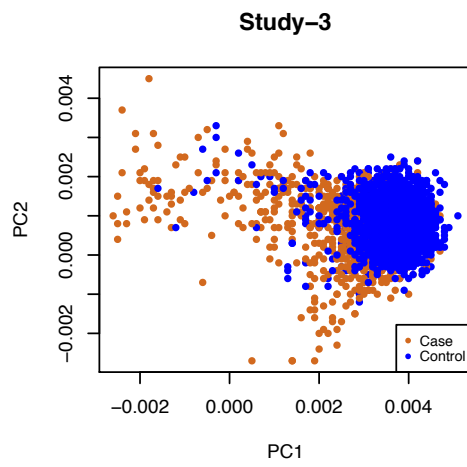

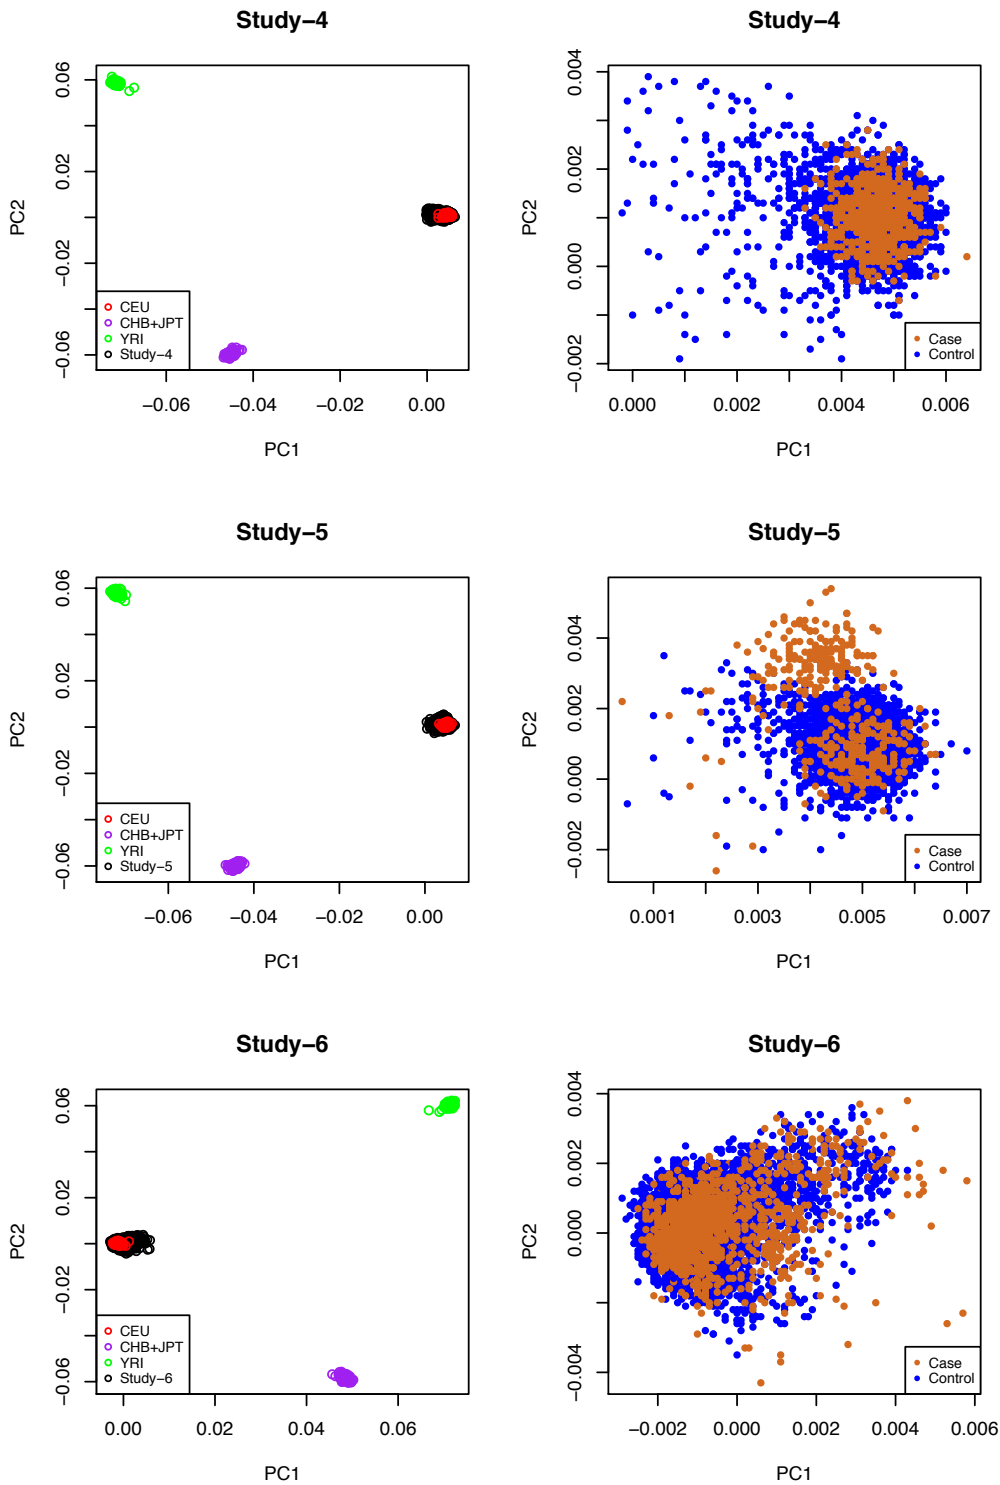

**Figure S5:** PCA plots for stage 1 sub-studies after removing population outliers. Left: PCA plots for HapMap subjects (red, green, purple) and subjects enrolled in each sub-study (black); Right: PCA plots for subjects enrolled in each sub-study (all are of European ancestry), with points colored by affection status)

### 3. Supplementary Tables

**Table S1: Association analysis results for all SNPs with  $P < 1 \times 10^{-6}$  (stage-1 studies only)**

| CHR | BP        | SNP         | Alleles   | Stage 1  |                    | Stage 2  |                    |
|-----|-----------|-------------|-----------|----------|--------------------|----------|--------------------|
|     |           |             |           | P        | OR (CI)            | P        | OR (CI)            |
| 1   | 200975064 | rs10920091  | A/G       | 9.38E-07 | 0.89 (0.85 - 0.93) | 8.03E-01 | 0.99 (0.91 - 1.08) |
| 1   | 200976145 | 1:200976145 | G/GA<br>C | 9.10E-07 | 0.89 (0.85 - 0.93) | NA       | NA                 |
| 1   | 231958984 | rs201957059 | CAT/<br>C | 6.29E-07 | 1.13 (1.08 - 1.19) | NA       | NA                 |
| 3   | 36856030  | rs9834970   | T/C       | 3.19E-08 | 0.88 (0.85 - 0.92) | 1.12E-03 | 0.87 (0.80 - 0.95) |
| 3   | 36859705  | rs1553656   | T/C       | 5.13E-07 | 0.89 (0.86 - 0.93) | 1.87E-03 | 0.87 (0.80 - 0.95) |
| 3   | 36862680  | rs4072458   | T/C       | 3.13E-07 | 0.89 (0.85 - 0.93) | 2.20E-03 | 0.88 (0.81 - 0.95) |
| 3   | 36869439  | rs4789      | T/C       | 2.71E-07 | 0.89 (0.85 - 0.93) | 1.08E-03 | 0.87 (0.80 - 0.95) |
| 3   | 36870230  | rs11129735  | A/G       | 2.24E-07 | 0.89 (0.85 - 0.93) | 1.11E-03 | 0.87 (0.80 - 0.95) |
| 3   | 36889621  | rs9985296   | T/C       | 3.54E-07 | 0.89 (0.85 - 0.93) | 4.34E-04 | 0.86 (0.79 - 0.93) |
| 3   | 36892717  | rs4441609   | T/C       | 2.29E-07 | 0.89 (0.85 - 0.93) | 4.02E-04 | 0.86 (0.79 - 0.93) |
| 3   | 36896270  | rs4327336   | T/C       | 3.22E-07 | 1.12 (1.07 - 1.18) | NA       | NA                 |
| 3   | 36900944  | rs4642070   | T/C       | 8.80E-07 | 1.12 (1.07 - 1.17) | 1.58E-03 | 1.15 (1.05 - 1.25) |
| 3   | 36906822  | rs28522146  | C/G       | 8.96E-07 | 0.89 (0.86 - 0.94) | 1.78E-03 | 0.87 (0.80 - 0.95) |
| 3   | 36915814  | rs4296548   | T/G       | 9.70E-07 | 0.89 (0.86 - 0.94) | 1.98E-03 | 0.87 (0.80 - 0.95) |
| 3   | 36932703  | rs10222527  | T/G       | 7.93E-07 | 1.12 (1.07 - 1.17) | NA       | NA                 |
| 3   | 36938180  | rs4328757   | T/C       | 6.33E-07 | 1.12 (1.07 - 1.17) | 3.02E-03 | 1.14 (1.04 - 1.24) |
| 3   | 36945591  | rs9882924   | T/C       | 1.43E-07 | 0.88 (0.85 - 0.93) | 5.03E-03 | 0.88 (0.81 - 0.96) |
| 3   | 36948417  | rs4678914   | T/G       | 1.72E-07 | 0.89 (0.85 - 0.93) | 2.13E-03 | 0.87 (0.80 - 0.95) |
| 3   | 53070755  | rs17304995  | A/G       | 9.59E-07 | 1.14 (1.08 - 1.2)  | 7.85E-01 | 1.01 (0.92 - 1.12) |
| 3   | 53082937  | rs7644973   | T/C       | 7.60E-07 | 0.88 (0.83 - 0.92) | 8.46E-01 | 0.99 (0.90 - 1.09) |



|   |           |             |              |          |                    |          |                    |
|---|-----------|-------------|--------------|----------|--------------------|----------|--------------------|
| 3 | 53085475  | rs71301807  | C/G          | 6.81E-07 | 1.14 (1.08 - 1.2)  | 8.50E-01 | 1.01 (0.92 - 1.11) |
| 3 | 191572842 | rs779329    | A/G          | 4.82E-07 | 1.12 (1.07 - 1.17) | 2.75E-01 | 1.05 (0.96 - 1.14) |
| 3 | 191575240 | rs1083673   | T/C          | 7.20E-07 | 0.89 (0.85 - 0.93) | 2.89E-01 | 0.96 (0.88 - 1.04) |
| 3 | 191578101 | rs779326    | T/C          | 7.29E-07 | 0.89 (0.85 - 0.93) | 2.70E-01 | 0.95 (0.88 - 1.04) |
| 6 | 98547979  | rs9385269   | T/C          | 5.92E-07 | 1.12 (1.07 - 1.16) | 2.76E-01 | 1.05 (0.96 - 1.14) |
| 6 | 98549801  | rs9401593   | A/C          | 7.64E-08 | 0.89 (0.85 - 0.93) | 8.35E-02 | 0.93 (0.85 - 1.01) |
| 6 | 98550289  | rs1906252   | A/C          | 7.50E-08 | 1.12 (1.08 - 1.17) | 8.52E-02 | 1.08 (0.99 - 1.17) |
| 6 | 98553894  | rs1487441   | A/G          | 7.12E-08 | 1.13 (1.08 - 1.17) | 8.20E-02 | 1.08 (0.99 - 1.17) |
| 6 | 98555272  | rs9375188   | T/C          | 9.47E-08 | 1.12 (1.08 - 1.17) | 8.42E-02 | 1.08 (0.99 - 1.17) |
| 6 | 98561749  | 6:98561749  | CAAT<br>TT/C | 1.34E-07 | 0.89 (0.85 - 0.93) | NA       | NA                 |
| 6 | 98562720  | rs9375195   | A/G          | 5.13E-07 | 1.12 (1.07 - 1.17) | 2.48E-01 | 1.05 (0.97 - 1.14) |
| 6 | 98565211  | rs1487445   | T/C          | 1.24E-07 | 1.12 (1.08 - 1.17) | 6.38E-02 | 1.08 (0.99 - 1.18) |
| 6 | 98566506  | 6:98566506  | CT/C         | 1.12E-07 | 0.89 (0.85 - 0.93) | NA       | NA                 |
| 6 | 98574560  | rs968050    | T/C          | 1.32E-07 | 1.12 (1.08 - 1.17) | 6.75E-02 | 1.08 (0.99 - 1.18) |
| 6 | 98576223  | rs12202969  | A/G          | 9.32E-08 | 1.12 (1.08 - 1.17) | 7.46E-02 | 1.08 (0.99 - 1.17) |
| 6 | 98577689  | rs9372734   | T/C          | 1.22E-07 | 1.12 (1.08 - 1.17) | 7.42E-02 | 1.08 (0.99 - 1.17) |
| 6 | 98582900  | rs12206087  | A/G          | 1.22E-07 | 1.12 (1.08 - 1.17) | 7.29E-02 | 1.08 (0.99 - 1.17) |
| 6 | 98583487  | rs375282393 | CAT/<br>C    | 1.83E-07 | 0.89 (0.85 - 0.93) | NA       | NA                 |
| 6 | 98583488  | rs72934503  | A/G          | 1.79E-07 | 0.89 (0.85 - 0.93) | NA       | NA                 |
| 6 | 98584711  | 6:98584711  | T/TA<br>A    | 1.59E-07 | 0.89 (0.85 - 0.93) | NA       | NA                 |
| 6 | 98584713  | rs201168005 | A/T          | 1.59E-07 | 1.12 (1.07 - 1.17) | NA       | NA                 |
| 6 | 98584715  | rs570208294 | A/T          | 1.59E-07 | 1.12 (1.07 - 1.17) | NA       | NA                 |
| 6 | 98584717  | 6:98584717  | T/TA         | 1.59E-07 | 1.12 (1.07 - 1.17) | NA       | NA                 |
| 6 | 98584720  | rs368928614 | T/G          | 1.23E-07 | 1.12 (1.08 - 1.17) | NA       | NA                 |
| 6 | 98584733  | rs9320913   | A/C          | 1.24E-07 | 1.12 (1.08 - 1.17) | 8.31E-02 | 1.08 (0.99 - 1.17) |
| 6 | 98588281  | rs370768052 | A/AT         | 2.16E-07 | 0.89 (0.85 - 0.93) | NA       | NA                 |

|   |          |             | T         |          |                    |          |                    |
|---|----------|-------------|-----------|----------|--------------------|----------|--------------------|
| 6 | 98591622 | rs2388334   | A/G       | 1.32E-07 | 0.89 (0.85 - 0.93) | 8.36E-02 | 0.93 (0.85 - 1.01) |
| 7 | 1858618  | rs6950455   | T/C       | 5.66E-07 | 0.89 (0.85 - 0.93) | 9.51E-02 | 0.93 (0.85 - 1.01) |
| 7 | 1858898  | rs6965294   | T/C       | 6.55E-07 | 1.12 (1.07 - 1.18) | 1.32E-01 | 1.07 (0.98 - 1.17) |
| 7 | 1860728  | 7:1860728   | A/AA<br>G | 9.16E-08 | 1.13 (1.08 - 1.18) | NA       | NA                 |
| 7 | 1861952  | rs34120092  | A/C       | 7.13E-08 | 0.88 (0.84 - 0.92) | 1.50E-01 | 0.94 (0.86 - 1.02) |
| 7 | 1863164  | rs9770241   | T/C       | 3.17E-08 | 0.88 (0.84 - 0.92) | 3.11E-01 | 0.96 (0.88 - 1.04) |
| 7 | 1863463  | rs56053419  | T/C       | 7.70E-08 | 0.88 (0.84 - 0.92) | 2.43E-01 | 0.95 (0.87 - 1.04) |
| 7 | 1866953  | rs55948146  | C/G       | 4.15E-08 | 1.14 (1.09 - 1.19) | 2.04E-01 | 1.06 (0.97 - 1.16) |
| 7 | 1867680  | rs7779512   | C/G       | 7.43E-08 | 1.13 (1.08 - 1.19) | 2.29E-01 | 1.06 (0.97 - 1.15) |
| 7 | 1868039  | rs7799782   | A/G       | 5.01E-08 | 0.88 (0.84 - 0.92) | 2.48E-01 | 0.95 (0.87 - 1.04) |
| 7 | 1868092  | rs7799807   | A/G       | 4.14E-08 | 0.88 (0.84 - 0.92) | 2.59E-01 | 0.95 (0.87 - 1.04) |
| 7 | 1868761  | rs12537430  | A/G       | 5.03E-08 | 0.88 (0.84 - 0.92) | 2.61E-01 | 0.95 (0.87 - 1.04) |
| 7 | 1868995  | rs12537479  | A/G       | 5.02E-08 | 0.88 (0.84 - 0.92) | 2.62E-01 | 0.95 (0.87 - 1.04) |
| 7 | 1869242  | rs35935754  | T/C       | 4.98E-08 | 0.88 (0.84 - 0.92) | 1.75E-01 | 0.94 (0.86 - 1.03) |
| 7 | 1870592  | rs11978270  | T/C       | 5.71E-08 | 1.13 (1.08 - 1.19) | NA       | NA                 |
| 7 | 1871062  | rs6949160   | T/C       | 5.87E-08 | 0.88 (0.84 - 0.92) | NA       | NA                 |
| 7 | 1872132  | rs66617818  | A/C       | 7.67E-08 | 1.13 (1.08 - 1.19) | 2.48E-01 | 1.05 (0.96 - 1.15) |
| 7 | 1872274  | 7:1872274:G | G/GA      | 4.61E-07 | 0.89 (0.85 - 0.93) | NA       | NA                 |
| 7 | 1872327  | rs559083240 | A/G       | 8.58E-07 | 0.89 (0.85 - 0.93) | NA       | NA                 |
| 7 | 1872328  | rs577957446 | T/C       | 8.53E-07 | 0.89 (0.85 - 0.93) | NA       | NA                 |
| 7 | 1872329  | rs540405859 | A/G       | 8.53E-07 | 1.12 (1.07 - 1.18) | NA       | NA                 |
| 7 | 1872330  | rs561886492 | T/C       | 8.53E-07 | 0.89 (0.85 - 0.93) | NA       | NA                 |
| 7 | 1873084  | rs4721090   | T/C       | 5.99E-09 | 1.15 (1.09 - 1.2)  | 1.93E-01 | 1.06 (0.97 - 1.16) |
| 7 | 1873343  | rs10237989  | A/G       | 2.93E-09 | 0.87 (0.83 - 0.91) | 1.75E-01 | 0.94 (0.86 - 1.03) |
| 7 | 1873879  | rs13222183  | A/G       | 3.44E-09 | 1.15 (1.1 - 1.2)   | 1.54E-01 | 1.07 (0.97 - 1.17) |
| 7 | 1873894  | rs13235380  | T/C       | 3.43E-09 | 0.87 (0.83 - 0.91) | 1.54E-01 | 0.94 (0.86 - 1.03) |

|   |         |             |           |          |                    |          |                    |
|---|---------|-------------|-----------|----------|--------------------|----------|--------------------|
| 7 | 1874753 | 7:1874753   | CAA/<br>C | 2.74E-08 | 1.15 (1.09 - 1.2)  | NA       | NA                 |
| 7 | 1877502 | rs4719308   | T/G       | 1.50E-09 | 1.15 (1.1 - 1.2)   | 1.09E-01 | 1.08 (0.98 - 1.18) |
| 7 | 1877503 | rs386709275 | T/G       | 1.44E-09 | 0.87 (0.83 - 0.91) | NA       | NA                 |
| 7 | 1878453 | rs1078112   | A/T       | 2.63E-09 | 0.87 (0.83 - 0.91) | 1.67E-01 | 0.94 (0.86 - 1.03) |
| 7 | 1878860 | rs13234214  | T/C       | 2.53E-09 | 0.87 (0.83 - 0.91) | 1.74E-01 | 0.94 (0.86 - 1.03) |
| 7 | 1878965 | rs13233509  | T/G       | 2.40E-09 | 0.87 (0.83 - 0.91) | 1.67E-01 | 0.94 (0.86 - 1.03) |
| 7 | 1879779 | rs10228057  | A/T       | 2.12E-09 | 1.15 (1.1 - 1.2)   | 1.52E-01 | 1.07 (0.98 - 1.16) |
| 7 | 1880699 | rs10950399  | T/C       | 3.27E-09 | 0.87 (0.83 - 0.91) | 9.52E-02 | 0.93 (0.85 - 1.01) |
| 7 | 1881369 | rs4236271   | T/C       | 2.01E-09 | 0.87 (0.83 - 0.91) | 1.55E-01 | 0.94 (0.86 - 1.02) |
| 7 | 1881813 | rs4719311   | T/C       | 2.36E-09 | 0.87 (0.83 - 0.91) | 1.90E-01 | 0.94 (0.86 - 1.03) |
| 7 | 1882227 | rs12540579  | A/C       | 1.52E-09 | 0.87 (0.83 - 0.91) | 9.63E-02 | 0.93 (0.85 - 1.01) |
| 7 | 1882470 | rs10950400  | T/C       | 3.24E-09 | 0.87 (0.83 - 0.91) | 1.79E-01 | 0.94 (0.86 - 1.03) |
| 7 | 1884630 | rs4449693   | C/G       | 3.76E-09 | 0.87 (0.83 - 0.91) | 1.98E-01 | 0.94 (0.86 - 1.03) |
| 7 | 1885064 | rs58222895  | A/G       | 3.67E-09 | 0.87 (0.83 - 0.91) | 1.49E-01 | 0.94 (0.86 - 1.02) |
| 7 | 1885069 | rs35729895  | T/C       | 3.67E-09 | 0.87 (0.83 - 0.91) | 1.49E-01 | 0.94 (0.86 - 1.02) |
| 7 | 1885144 | rs13226911  | T/G       | 2.08E-09 | 1.15 (1.1 - 1.21)  | 2.07E-01 | 1.07 (0.96 - 1.18) |
| 7 | 1885178 | rs140364877 | T/C       | 1.52E-09 | 0.87 (0.83 - 0.91) | 1.39E-01 | 0.92 (0.83 - 1.03) |
| 7 | 1885415 | rs10233560  | T/C       | 1.13E-09 | 1.15 (1.1 - 1.21)  | 1.92E-01 | 1.06 (0.97 - 1.16) |
| 7 | 1886388 | rs6953693   | C/G       | 1.64E-09 | 1.15 (1.1 - 1.21)  | 1.96E-01 | 1.06 (0.97 - 1.16) |
| 7 | 1886535 | rs6952808   | C/G       | 1.65E-09 | 0.87 (0.83 - 0.91) | 2.11E-01 | 0.95 (0.87 - 1.03) |
| 7 | 1886725 | rs6977733   | A/T       | 2.52E-09 | 0.87 (0.83 - 0.91) | 2.10E-01 | 0.95 (0.87 - 1.03) |
| 7 | 1886865 | rs6954521   | A/C       | 2.29E-09 | 0.87 (0.83 - 0.91) | 2.11E-01 | 0.95 (0.87 - 1.03) |
| 7 | 1886872 | rs6978048   | T/G       | 2.29E-09 | 1.15 (1.1 - 1.2)   | 2.11E-01 | 1.06 (0.97 - 1.16) |
| 7 | 1886937 | rs6954673   | T/C       | 2.47E-09 | 0.87 (0.83 - 0.91) | 2.11E-01 | 0.95 (0.87 - 1.03) |
| 7 | 1887362 | rs6957894   | A/G       | 1.68E-09 | 0.87 (0.83 - 0.91) | 2.00E-01 | 0.94 (0.86 - 1.03) |
| 7 | 1887930 | rs4719318   | A/G       | 1.56E-09 | 0.87 (0.83 - 0.91) | 1.97E-01 | 0.94 (0.86 - 1.03) |
| 7 | 1888094 | rs4719319   | A/G       | 3.07E-09 | 0.87 (0.83 - 0.91) | 2.10E-01 | 0.95 (0.87 - 1.03) |

|   |         |              |      |          |                    |          |                    |
|---|---------|--------------|------|----------|--------------------|----------|--------------------|
| 7 | 1888180 | 7:1888180:TC | T/TC | 1.94E-09 | 0.87 (0.83 - 0.91) | NA       | NA                 |
| 7 | 1888185 | rs71531445   | A/G  | 2.16E-09 | 1.15 (1.1 - 1.2)   | NA       | NA                 |
| 7 | 1889521 | rs10260585   | A/G  | 2.97E-09 | 0.87 (0.83 - 0.91) | 1.86E-01 | 0.94 (0.86 - 1.03) |
| 7 | 1890764 | rs4256490    | A/G  | 2.98E-09 | 0.87 (0.83 - 0.91) | 1.66E-01 | 0.94 (0.86 - 1.03) |
| 7 | 1890925 | rs4601204    | T/C  | 3.20E-09 | 0.87 (0.83 - 0.91) | 1.50E-01 | 0.94 (0.86 - 1.02) |
| 7 | 1892565 | rs4721121    | T/C  | 1.33E-09 | 1.15 (1.1 - 1.21)  | 1.67E-01 | 1.06 (0.97 - 1.16) |
| 7 | 1893311 | rs4721122    | C/G  | 2.04E-09 | 1.15 (1.1 - 1.21)  | 1.68E-01 | 1.06 (0.97 - 1.16) |
| 7 | 1894022 | rs12699404   | A/T  | 5.17E-09 | 1.15 (1.1 - 1.2)   | 1.67E-01 | 1.06 (0.97 - 1.16) |
| 7 | 1894116 | rs7810038    | T/C  | 3.56E-09 | 1.15 (1.1 - 1.2)   | 1.56E-01 | 1.07 (0.97 - 1.16) |
| 7 | 1894884 | rs11768541   | A/G  | 4.27E-09 | 0.87 (0.83 - 0.91) | 1.53E-01 | 0.94 (0.86 - 1.03) |
| 7 | 1895629 | rs10263703   | C/G  | 4.16E-11 | 0.86 (0.82 - 0.9)  | 4.25E-02 | 0.91 (0.84 - 1.00) |
| 7 | 1895641 | rs11762834   | T/C  | 3.64E-09 | 0.87 (0.83 - 0.91) | 1.46E-01 | 0.94 (0.86 - 1.02) |
| 7 | 1895666 | rs10950407   | T/G  | 1.06E-08 | 1.14 (1.09 - 1.2)  | 1.69E-01 | 1.06 (0.97 - 1.16) |
| 7 | 1895755 | rs12667600   | A/C  | 2.41E-09 | 0.87 (0.83 - 0.91) | 1.60E-01 | 0.94 (0.86 - 1.03) |
| 7 | 1896413 | rs4236274    | A/G  | 3.57E-11 | 1.16 (1.11 - 1.22) | 3.01E-02 | 1.10 (1.01 - 1.20) |
| 7 | 1898075 | rs4602777    | T/C  | 9.17E-10 | 0.87 (0.83 - 0.91) | 2.14E-03 | 0.87 (0.80 - 0.95) |
| 7 | 1898671 | 7:1898671    | R/I  | 6.02E-08 | 0.88 (0.84 - 0.92) | NA       | NA                 |
| 7 | 1899479 | rs12155225   | T/C  | 9.89E-10 | 1.15 (1.1 - 1.21)  | 1.87E-02 | 1.11 (1.02 - 1.21) |
| 7 | 1899547 | rs12155464   | C/G  | 2.91E-07 | 0.86 (0.82 - 0.91) | NA       | NA                 |
| 7 | 1899935 | rs13312316   | T/C  | 2.85E-08 | 0.88 (0.84 - 0.92) | 4.36E-02 | 0.91 (0.83 - 1.00) |
| 7 | 1900003 | rs12674189   | C/G  | 8.12E-10 | 0.87 (0.83 - 0.91) | 2.63E-02 | 0.89 (0.80 - 0.99) |
| 7 | 1900012 | rs13312332   | T/C  | 3.30E-09 | 0.87 (0.83 - 0.91) | NA       | NA                 |
| 7 | 1900013 | rs12672749   | T/G  | 3.30E-09 | 1.15 (1.1 - 1.2)   | 5.66E-02 | 1.13 (1.00 - 1.28) |
| 7 | 1900208 | rs386709280  | T/C  | 3.40E-10 | 0.87 (0.83 - 0.91) | NA       | NA                 |
| 7 | 1903100 | rs4610628    | T/C  | 4.70E-08 | 0.88 (0.84 - 0.92) | 7.12E-02 | 0.92 (0.84 - 1.01) |
| 7 | 1904709 | rs11761670   | T/C  | 3.76E-08 | 0.88 (0.84 - 0.92) | 8.60E-02 | 0.93 (0.85 - 1.01) |
| 7 | 1906979 | 7:1906979    | A/AC | 2.79E-08 | 1.14 (1.09 - 1.19) | NA       | NA                 |
| 7 | 1907009 | rs12672286   | A/G  | 6.18E-08 | 0.88 (0.84 - 0.92) | 6.77E-02 | 0.92 (0.84 - 1.01) |

|   |          |            |              |          |                    |          |                    |
|---|----------|------------|--------------|----------|--------------------|----------|--------------------|
| 7 | 1908113  | 7:1908113  | A/AC<br>CCAC | 4.76E-08 | 1.14 (1.09 - 1.19) | NA       | NA                 |
| 7 | 1908727  | rs6949794  | A/G          | 1.63E-07 | 0.88 (0.85 - 0.93) | 8.35E-02 | 0.93 (0.85 - 1.01) |
| 7 | 1912057  | rs4721134  | A/G          | 2.71E-07 | 0.89 (0.85 - 0.93) | 5.04E-02 | 0.92 (0.84 - 1.00) |
| 7 | 1925120  | 7:1925120  | G/GG<br>T    | 7.36E-07 | 0.89 (0.86 - 0.94) | NA       | NA                 |
| 7 | 1926090  | rs6967442  | A/G          | 8.65E-07 | 1.12 (1.07 - 1.17) | 9.18E-03 | 1.12 (1.03 - 1.22) |
| 7 | 1926577  | rs10950422 | T/C          | 8.63E-07 | 1.12 (1.07 - 1.17) | 9.14E-03 | 1.12 (1.03 - 1.22) |
| 7 | 1926745  | rs12534679 | A/G          | 7.98E-07 | 0.9 (0.86 - 0.94)  | 9.13E-03 | 0.89 (0.82 - 0.97) |
| 7 | 1979750  | rs10950456 | A/G          | 5.27E-07 | 1.12 (1.07 - 1.17) | 5.11E-03 | 1.13 (1.04 - 1.23) |
| 7 | 1982181  | rs12154473 | A/G          | 4.27E-07 | 0.89 (0.85 - 0.93) | 1.30E-02 | 0.90 (0.82 - 0.98) |
| 9 | 23345347 | rs11794152 | A/G          | 2.40E-07 | 0.89 (0.85 - 0.93) | 2.18E-02 | 0.90 (0.83 - 0.98) |
| 9 | 23346842 | rs10429537 | C/G          | 2.51E-07 | 0.89 (0.85 - 0.93) | 2.04E-02 | 0.90 (0.83 - 0.98) |
| 9 | 23346850 | rs10429582 | T/C          | 2.24E-07 | 0.89 (0.85 - 0.93) | 2.16E-02 | 0.90 (0.83 - 0.98) |
| 9 | 23347724 | rs12555870 | A/G          | 7.31E-07 | 0.9 (0.86 - 0.94)  | 4.40E-02 | 0.92 (0.84 - 1.00) |
| 9 | 23347865 | rs12553324 | C/G          | 1.53E-07 | 0.89 (0.85 - 0.93) | 2.28E-02 | 0.90 (0.83 - 0.98) |
| 9 | 23350420 | rs34522021 | T/C          | 8.57E-07 | 1.12 (1.07 - 1.17) | 3.98E-03 | 1.13 (1.04 - 1.23) |
| 9 | 23352293 | rs12554512 | T/C          | 3.20E-07 | 0.89 (0.85 - 0.93) | 1.50E-02 | 0.90 (0.82 - 0.98) |
| 9 | 23354940 | rs7467480  | A/T          | 2.55E-07 | 1.12 (1.07 - 1.17) | 1.62E-02 | 1.11 (1.02 - 1.21) |
| 9 | 23355310 | rs4977839  | A/G          | 2.55E-07 | 1.12 (1.07 - 1.17) | 1.63E-02 | 1.11 (1.02 - 1.21) |
| 9 | 23355664 | rs4977836  | A/C          | 3.74E-07 | 1.12 (1.07 - 1.17) | 1.56E-02 | 1.11 (1.02 - 1.21) |
| 9 | 23357826 | rs7868984  | T/C          | 2.76E-07 | 0.89 (0.85 - 0.93) | 1.67E-02 | 0.90 (0.83 - 0.98) |
| 9 | 23358081 | rs7029201  | A/G          | 3.62E-07 | 1.12 (1.07 - 1.17) | 1.61E-02 | 1.11 (1.02 - 1.21) |
| 9 | 23358495 | rs7029718  | A/G          | 4.07E-07 | 1.12 (1.07 - 1.17) | 1.62E-02 | 1.11 (1.02 - 1.21) |
| 9 | 23358875 | rs13294439 | A/C          | 3.77E-07 | 0.89 (0.85 - 0.93) | 1.61E-02 | 0.90 (0.83 - 0.98) |
| 9 | 23360417 | rs1590949  | C/G          | 3.49E-07 | 0.89 (0.85 - 0.93) | 1.51E-02 | 0.90 (0.83 - 0.98) |
| 9 | 23362311 | rs11793831 | T/G          | 4.02E-07 | 1.12 (1.07 - 1.17) | 2.05E-02 | 1.11 (1.02 - 1.21) |
| 9 | 23362812 | 9:23362812 | <CN0<br>>/A  | 4.14E-07 | 1.12 (1.07 - 1.17) | NA       | NA                 |

|    |          |             |             |          |                    |          |                    |
|----|----------|-------------|-------------|----------|--------------------|----------|--------------------|
| 9  | 23370987 | rs541405065 | <CN0<br>>/A | 6.28E-07 | 1.12 (1.07 - 1.17) | NA       | NA                 |
| 12 | 49389320 | rs1054442   | A/C         | 5.25E-07 | 0.89 (0.85 - 0.93) | 3.97E-03 | 0.88 (0.81 - 0.96) |
| 16 | 13309375 | rs403898    | T/C         | 8.19E-07 | 0.89 (0.85 - 0.93) | 5.86E-01 | 1.03 (0.94 - 1.12) |
| 16 | 13310075 | rs386789242 | T/G         | 6.87E-07 | 1.12 (1.07 - 1.17) | NA       | NA                 |
| 16 | 13310168 | rs377027    | C/G         | 7.55E-07 | 1.12 (1.07 - 1.17) | 3.88E-01 | 0.96 (0.88 - 1.05) |
| 16 | 13310535 | rs410055    | T/C         | 6.86E-07 | 0.89 (0.85 - 0.93) | 4.00E-01 | 1.04 (0.95 - 1.13) |
| 16 | 13312029 | rs396357    | A/G         | 8.25E-07 | 1.12 (1.07 - 1.17) | 4.31E-01 | 0.97 (0.89 - 1.05) |
| 16 | 13315986 | rs1149405   | T/C         | 9.75E-07 | 1.12 (1.07 - 1.17) | 4.85E-01 | 0.97 (0.89 - 1.06) |
| 16 | 13316788 | rs591066    | A/G         | 5.84E-07 | 1.13 (1.08 - 1.19) | 5.02E-01 | 0.97 (0.88 - 1.06) |
| 16 | 64720556 | rs976497    | A/C         | 4.30E-07 | 0.86 (0.81 - 0.91) | 5.62E-01 | 1.04 (0.92 - 1.17) |
| 16 | 64720943 | rs976498    | T/C         | 4.08E-07 | 1.17 (1.1 - 1.24)  | 6.30E-01 | 0.97 (0.86 - 1.09) |
| 16 | 89706992 | rs2052868   | T/C         | 8.65E-07 | 0.88 (0.83 - 0.92) | 1.33E-01 | 0.92 (0.83 - 1.02) |
| 16 | 90059336 | rs11076649  | C/G         | 8.97E-07 | 1.17 (1.1 - 1.25)  | 2.80E-01 | 1.07 (0.94 - 1.22) |
| 17 | 37847799 | 17:37847799 | T/TA        | 8.55E-07 | 1.12 (1.07 - 1.18) | NA       | NA                 |
| 17 | 37893484 | rs4795393   | T/C         | 6.00E-07 | 0.89 (0.85 - 0.93) | 4.35E-03 | 0.88 (0.81 - 0.96) |
| 19 | 13130549 | rs7248711   | T/G         | 1.51E-07 | 1.15 (1.09 - 1.21) | NA       | NA                 |
| 19 | 13151108 | rs1077151   | A/G         | 6.98E-07 | 1.13 (1.08 - 1.18) | 3.36E-01 | 1.04 (0.96 - 1.14) |
| 19 | 13153035 | rs4926298   | A/G         | 4.65E-07 | 0.88 (0.84 - 0.93) | 3.20E-01 | 0.96 (0.88 - 1.04) |
| 19 | 13158678 | rs931068    | T/C         | 9.46E-07 | 1.13 (1.07 - 1.18) | 3.36E-01 | 1.04 (0.96 - 1.14) |
| 19 | 13159569 | rs8104231   | A/T         | 4.57E-07 | 1.13 (1.08 - 1.19) | 3.23E-01 | 1.04 (0.96 - 1.14) |
| 19 | 13166480 | rs62109902  | A/G         | 3.76E-07 | 0.8 (0.73 - 0.87)  | 9.65E-01 | 1.00 (0.85 - 1.18) |
| 19 | 13168623 | 19:13168623 | CCT/C       | 3.67E-07 | 0.88 (0.84 - 0.93) | NA       | NA                 |
| 19 | 13174312 | rs11085829  | A/G         | 3.29E-07 | 0.88 (0.84 - 0.93) | 3.75E-01 | 0.96 (0.88 - 1.05) |
| 19 | 13176815 | rs10423745  | T/C         | 4.29E-07 | 1.13 (1.08 - 1.19) | 3.83E-01 | 1.04 (0.95 - 1.13) |
| 19 | 13185882 | 19:13185882 | R/I         | 9.55E-07 | 1.13 (1.08 - 1.19) | NA       | NA                 |
| 19 | 13191461 | rs8111617   | T/C         | 2.44E-07 | 0.88 (0.84 - 0.92) | 3.95E-01 | 0.96 (0.88 - 1.05) |

**Table S2: Meta-analysis results for previous BD GWAS hits \***

| CH<br>R | BP        | SNP        | Alleles | P-value  | OR               | Note           |
|---------|-----------|------------|---------|----------|------------------|----------------|
| 2       | 97405440  | rs2271893  | A/G     | 1.71E-04 | 0.91 (0.87-0.95) | <i>LMAN2L</i>  |
| 2       | 185533580 | rs7597593  | T/C     | 1.09E-02 | 1.07 (1.02-1.11) | <i>ZNF804A</i> |
| 3       | 52279594  | rs7618915  | A/G     | 9.26E-04 | 0.92 (0.88-0.97) | 3p21           |
| 3       | 52718280  | rs10865974 | T/G     | 9.04E-05 | 0.91 (0.87-0.95) | 3p21           |
| 3       | 52733106  | rs6765687  | T/C     | 1.67E-04 | 1.10 (1.05-1.16) | 3p21           |
| 3       | 52815905  | rs2710323  | T/C     | 1.08E-03 | 1.08 (1.03-1.13) | 3p21           |
| 3       | 52821011  | rs1042779  | A/G     | 1.23E-04 | 1.09 (1.05-1.15) | 3p21           |
| 3       | 52833219  | rs2535629  | A/G     | 1.36E-04 | 0.91 (0.87-0.95) | 3p21           |
| 3       | 52835354  | rs736408   | T/C     | 9.18E-05 | 0.91 (0.87-0.95) | 3p21           |
| 5       | 7519298   | rs17826816 | A/G     | 3.51E-03 | 0.93 (0.88-0.97) | <i>ADCY2</i>   |
| 6       | 152738754 | rs17082664 | A/G     | 8.10E-04 | 0.89 (0.83-0.95) | <i>SYNE1</i>   |
| 6       | 152790573 | rs9371601  | T/G     | 2.72E-04 | 1.10 (1.05-1.15) | <i>SYNE1</i>   |
| 6       | 152791474 | rs7747960  | A/C     | 1.86E-03 | 1.12 (1.05-1.2)  | <i>SYNE1</i>   |
| 10      | 62179812  | rs10994336 | T/C     | 1.37E-02 | 1.14 (1.04-1.24) | <i>ANK3</i>    |
| 10      | 62181128  | rs10994338 | A/G     | 1.43E-02 | 1.13 (1.04-1.24) | <i>ANK3</i>    |
| 10      | 62185494  | rs4948418  | T/C     | 7.55E-03 | 1.14 (1.04-1.25) | <i>ANK3</i>    |
| 10      | 62222107  | rs10994359 | T/C     | 1.11E-02 | 0.88 (0.80-0.96) | <i>ANK3</i>    |
| 10      | 62279124  | rs10994397 | T/C     | 1.78E-02 | 1.13 (1.03-1.23) | <i>ANK3</i>    |
| 10      | 62322034  | rs10994415 | T/C     | 3.36E-02 | 0.91 (0.84-0.98) | <i>ANK3</i>    |
| 11      | 79077193  | rs12576775 | A/G     | 1.25E-03 | 0.90 (0.85-0.96) | <i>TENM4</i>   |
| 11      | 79083620  | rs12290811 | A/T     | 3.59E-04 | 1.12 (1.06-1.19) | <i>TENM4</i>   |
| 12      | 2345295   | rs1006737  | A/G     | 3.30E-04 | 1.09 (1.04-1.14) | <i>CACNA1C</i> |
| 12      | 2419896   | rs4765913  | A/T     | 2.28E-04 | 1.11 (1.05-1.17) | <i>CACNA1C</i> |
| 13      | 42653437  | rs1012053  | A/C     | 2.95E-01 | 1.04 (0.97-1.10) | <i>DGKH</i>    |
| 16      | 23634026  | rs420259   | A/G     | 1.21E-01 | 1.05 (0.99-1.10) | <i>PALB2</i>   |
| 16      | 23640467  | rs249954   | A/G     | 2.72E-01 | 0.97 (0.92-1.02) | <i>PALB2</i>   |
| 19      | 19361735  | rs1064395  | A/G     | 3.36E-04 | 1.11 (1.05-1.18) | <i>NCAN</i>    |

\*6q16.1, 12q13.1, *TRANK1* and *MAD1L1* were reported in the manuscript so were not included in this table.

**Table S3. Results of approximate conditional association analysis**

| CHR | POS      | SNP        | Allele | FRQ  | BETA    | SE     | P        | P Joint  |
|-----|----------|------------|--------|------|---------|--------|----------|----------|
| 3   | 36856030 | rs9834970  | T      | 0.50 | -0.1261 | 0.0197 | 4.83E-10 | 1.59E-10 |
| 6   | 98553894 | rs1487441  | A      | 0.49 | 0.1087  | 0.0195 | 2.58E-08 | 2.53E-08 |
| 7   | 1896413  | rs4236274  | G      | 0.39 | -0.1406 | 0.0205 | 8.49E-12 | 7.25E-12 |
| 9   | 23347853 | rs10757417 | G      | 0.45 | 0.1143  | 0.0198 | 8.89E-09 | 7.96E-09 |
| 12  | 49472965 | rs11168850 | A      | 0.44 | 0.1159  | 0.0199 | 2.03E-08 | 5.86E-09 |
| 17  | 37846512 | rs2517959  | A      | 0.33 | 0.1216  | 0.0209 | 4.53E-09 | 6.07E-09 |

Allele: the effect allele; FRQ: frequency of the effect allele; BETA: beta coefficient; SE: standard error of the beta coefficient; P: p-value from the original meta-analysis; P\_Joint: p-value from a joint analysis of all the selected SNPs. For the loci on chromosomes 9 and 12, GCTA selected SNPs that differed from those with the smallest p-value in the meta-analysis. (Default parameters were used for this analysis: --massoc-p 5e-8; --massoc-wind 10000; --massoc-collinear 0.9)



**Table S4. Summary of dbGaP GWAS datasets**

| dbGaP_access_id  | Platform      | Phenotype                   | Sample size | Used In |
|------------------|---------------|-----------------------------|-------------|---------|
| phs000124.v2.p1  | HumanHap550   | Neuroblastoma               | 1,662       | Study-4 |
| phs000404.v1.p1* | HumanOmni2.5M | Nicotine Dependence         | 1,527       | Study-5 |
| phs000303.v1.p1  | HumanOmni2.5M | Refractive Error            | 1,869       | Study-5 |
| phs000203.v1.p1  | Human660W     | Peripheral Arterial Disease | 3,337       | Study-6 |
| phs000170.v1.p1# | Human660W     | Cataract and HDL            | 3,947       | Study-6 |
| phs000188.v1.p1  | Human660W/1M  | QRS Duration                | 2,873       | Study-6 |
| phs000237.v1.p1  | Human660W/1M  | Type 2 Diabetes             | 3,443       | Study-6 |
| phs000234.v1.p1  | Human660W     | Dementia                    | 1,706       | Study-6 |

\* Consent group General Research Use only

# Family-based study design

## Supplementary References:

- 1 Muhleisen, T.W., Leber, M., Schulze, T.G., Strohmaier, J., Degenhardt, F., Treutlein, J., Mattheisen, M., Forstner, A.J., Schumacher, J., Breuer, R. *et al.* (2014) Genome-wide association study reveals two new risk loci for bipolar disorder. *Nat Commun*, **5**, 3339.
- 2 Green, E.K., Hamshere, M., Forty, L., Gordon-Smith, K., Fraser, C., Russell, E., Grozeva, D., Kirov, G., Holmans, P., Moran, J.L. *et al.* (2013) Replication of bipolar disorder susceptibility alleles and identification of two novel genome-wide significant associations in a new bipolar disorder case-control sample. *Mol. Psychiatry*, **18**, 1302-1307.
- 3 Cichon, S., Muhleisen, T.W., Degenhardt, F.A., Mattheisen, M., Miro, X., Strohmaier, J., Steffens, M., Meesters, C., Herms, S., Weingarten, M. *et al.* (2011) Genome-wide association study identifies genetic variation in neurocan as a susceptibility factor for bipolar disorder. *Am. J. Hum. Genet.*, **88**, 372-381.
- 4 Chen, D.T., Jiang, X., Akula, N., Shugart, Y.Y., Wendland, J.R., Steele, C.J., Kassem, L., Park, J.H., Chatterjee, N., Jamain, S. *et al.* (2013) Genome-wide association study meta-analysis of European and Asian-ancestry samples identifies three novel loci associated with bipolar disorder. *Mol. Psychiatry*, **18**, 195-205.
- 5 Psychiatric GWAS Consortium Bipolar Disorder Working Group. (2011) Large-scale genome-wide association analysis of bipolar disorder identifies a new susceptibility locus near ODZ4. *Nat. Genet.*, **43**, 977-983.
- 6 Ferreira, M.A., O'Donovan, M.C., Meng, Y.A., Jones, I.R., Ruderfer, D.M., Jones, L., Fan, J., Kirov, G., Perlis, R.H., Green, E.K. *et al.* (2008) Collaborative genome-wide association analysis supports a role for ANK3 and CACNA1C in bipolar disorder. *Nat. Genet.*, **40**, 1056-1058.
- 7 Wellcome Trust Case Control Consortium. (2007) Genome-wide association study of 14,000 cases of seven common diseases and 3,000 shared controls. *Nature*, **447**, 661-678.
- 8 Schulze, T.G., Alda, M., Adli, M., Akula, N., Arda, R., Bui, E.T., Chillotti, C., Cichon, S., Czerski, P., Del Zompo, M. *et al.* (2010) The International Consortium on Lithium Genetics (ConLiGen): an initiative by the NIMH and IGSLI to study the genetic basis of response to lithium treatment. *Neuropsychobiology*, **62**, 72-78.
- 9 Hou, L., Heilbronner, U., Degenhardt, F., Adli, M., Akiyama, K., Akula, N., Arda, R., Arias, B., Backlund, L., Banzato, C.E. *et al.* (2016) Genetic variants associated with response to lithium treatment in bipolar disorder: a genome-wide association study. *Lancet*, **387**, 1085-1093.
